# Supplementary material for: A novel fluorescent polymer brushes film as a device for ultrasensitive detection of TNT
Source: Royal Society of Chemistry journal article supplement (doi:10.1039/c2ta00514j), 2012-11-05
Supplement: c2ta00514j.pdf [file c2ta00514j.pdf]

## Supporting Information

### A Novel Fluorescent Polymer Brushes Film as A Device for Ultrasensitive Detection of TNT

Xudong Yang<sup>a</sup>, Bowen Shen<sup>a</sup>, Yingnan Jiang<sup>b</sup>, Zixi Zhao<sup>a</sup>, Chuanxi Wang<sup>a</sup>, Cheng  
Ma<sup>a</sup>, Quan Lin<sup>\*a</sup> and Bai Yang<sup>a</sup>

<sup>\*a</sup> State Key Laboratory of Supramolecular Structure and Materials, College of  
Chemistry, Jilin University, Changchun, 130012, P. R. China, Fax: +86-431-85193423;  
Tel: +86-431-85168283; E-mails: [linquan@jlu.edu.cn](mailto:linquan@jlu.edu.cn)

<sup>b</sup> Lab for Polymer Composites Engineering , Changchun Institute of Applied  
Chemistry Chinese Academy of Sciences, 130022, P. R. China

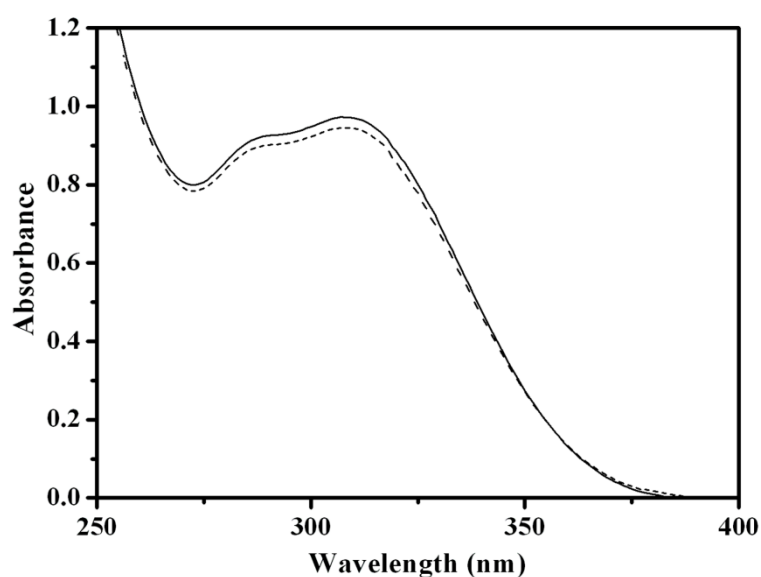

**Figure S1.** The UV absorption spectra of d-TPE solution before ( $1 \times 10^{-3}$  mol/L, 3 mL) (solid line) and after (dotted line) interacting with the PAA brushes film. The absorbance were 0.97262 and 0.94525, respectively. According to the Bouguer–Lambert–Beer law:  $A = \lg(1/T) = Kbc$ ,  $A_1/A_2 = C_1/C_2$ ,  $C_2 = 9.719 \times 10^{-4}$  mol/L.  $C = C_1 - C_2 = 2.814 \times 10^{-5}$  mol/L, the amounts of d-TPE molecular self-assemble on the brushes film was  $8.442 \times 10^{-8}$  mol. ( $2.814 \times 10^{-5}$  mol/L  $\times$  0.003 L)

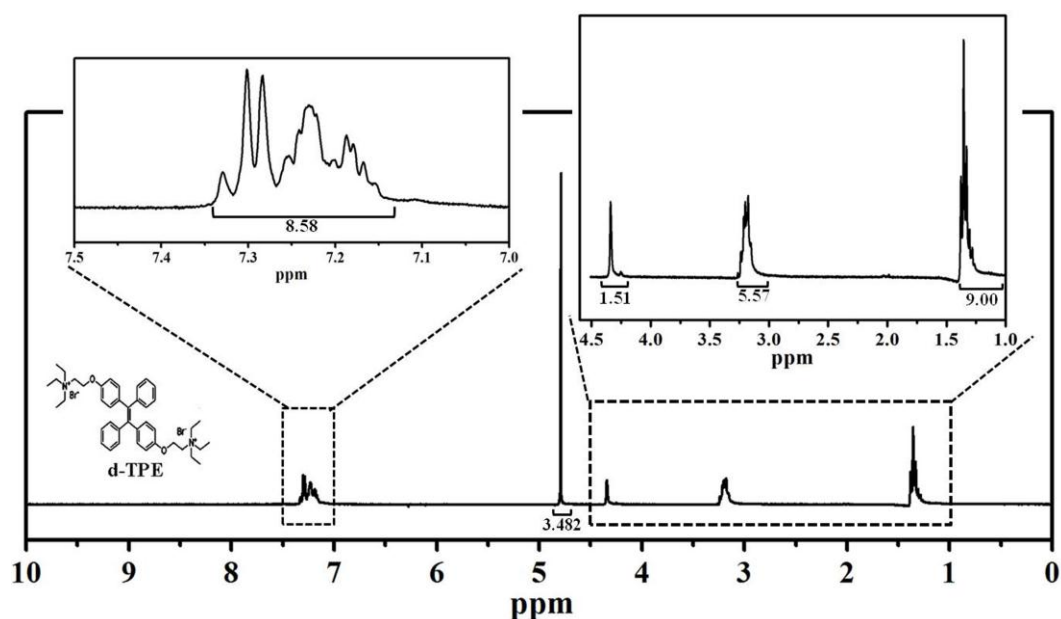

**Figure S2.** The structure of tetraphenylethene derivate (d-TPE) was confirmed by  $^1\text{H}$  NMR spectroscopy in  $\text{D}_2\text{O}$ . The proton chemical shift at 7.21 ppm was assigned to the phenyl ring and the shift at 4.34 ppm could be attributed to the chemical shift of  $-\text{CH}_2-$  in 1-methoxy-4-methylbenzene. The proton chemical shift at 3.196 ppm was attributed to the  $-\text{CH}_2-$  in methylethanaminium bromide and the shift at 1.36 ppm assigned to the proton in methyl groups. All structures indicates the origin of monomer tetraphenylethene derivate (d-TPE).

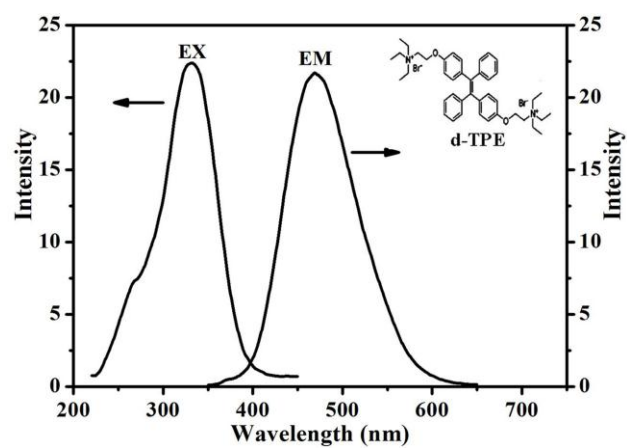

**Figure S3.** The excitation (EX) and emission (EM) spectra of d-TPE molecules in aqueous solution. Insert shows the structure of d-TPE molecule.

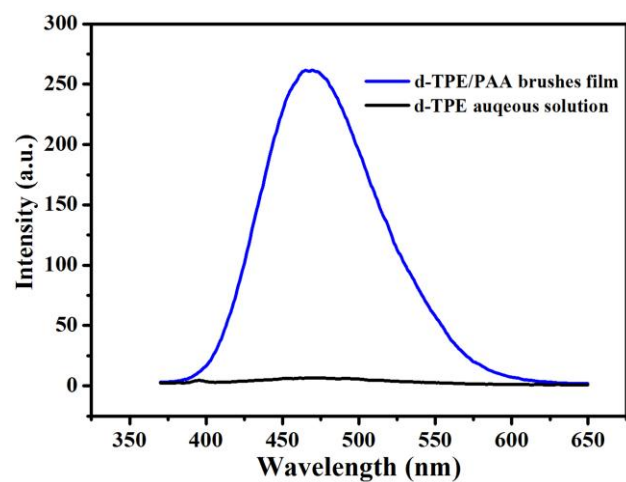

**Figure S4.** The emission spectra of d-TPE/PAA brushes film (blue line) and d-TPE molecules aqueous solution ( $10^{-3}$  M) (black line), ( $\lambda_{\text{ex}} = 340$  nm).

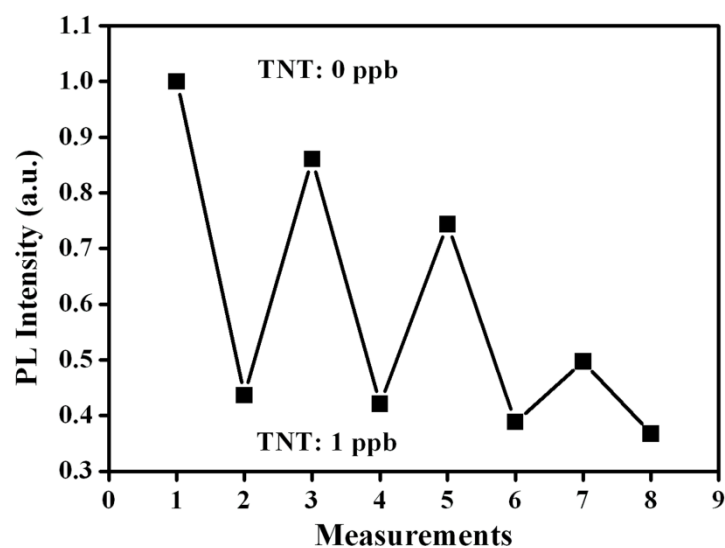

**Figure S5.** The normalized fluorescence recovery cycles of free d-TPE molecules with TNT concentration between 0 and 1 ppb. Compared with the d-TPE combining with PAA brushes, the free d-TPE molecules can be washed off easily from the substrate, which indicated that the free d-TPE molecules cannot show a good recovery cycles character.

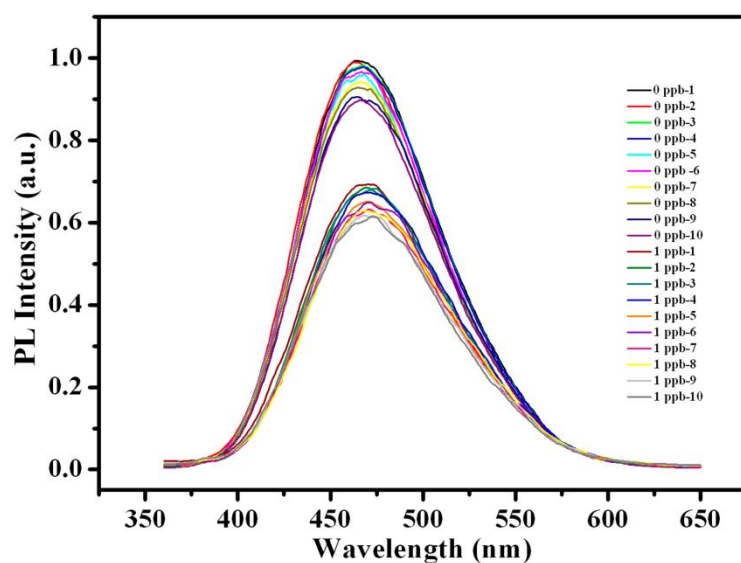

**Figure S6.** The normalized emission spectra of d-TPE/PAA brushes film with different TNT concentration of 0 ppb and 1 ppb. Each cycle is corresponding to the brushes film washed by methanol and annealed in vacuum at 60 °C for 2 hours after immersed in TNT aqueous solution. The measurements are 10 cycles, ( $\lambda_{\text{ex}} = 340$  nm).

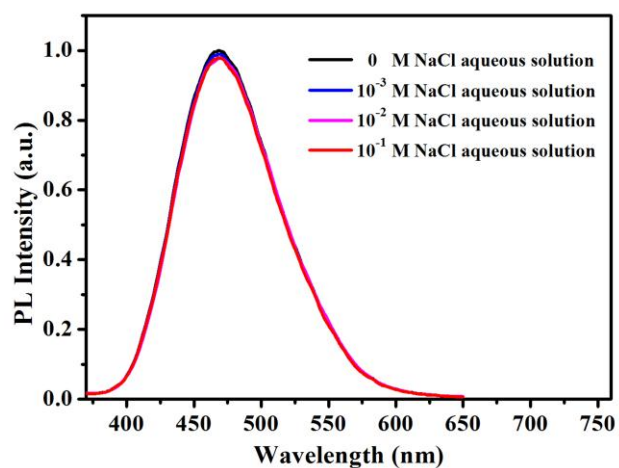

**Figure S7.** The normalized emission spectra of d-TPE/PAA brushes film with water, varying concentrations of NaCl aqueous solution ( $10^{-3}$  M,  $10^{-2}$  M,  $10^{-1}$  M). The d-TPE/PAA brushes film exhibited a stable fluorescence to varying NaCl concentrations.

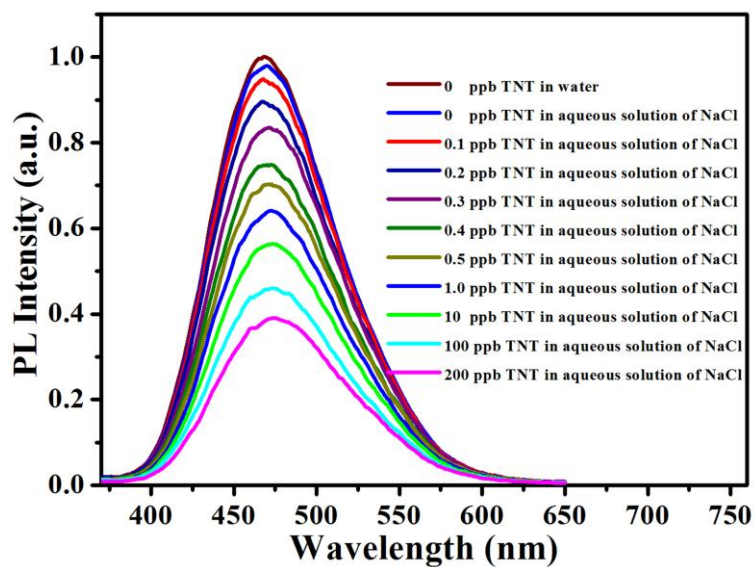

**Figure S8.** The normalized emission spectra of d-TPE/PAA brushes film with water, aqueous solution of NaCl ( $10^{-2}$  M) and various concentrations of TNT (0-200 ppb) in aqueous solution of NaCl ( $10^{-2}$  M) ( $\lambda_{\text{ex}} = 340$  nm). The brushes film shows good fluorescence stability and highly sensitive to TNT in NaCl aqueous solution.

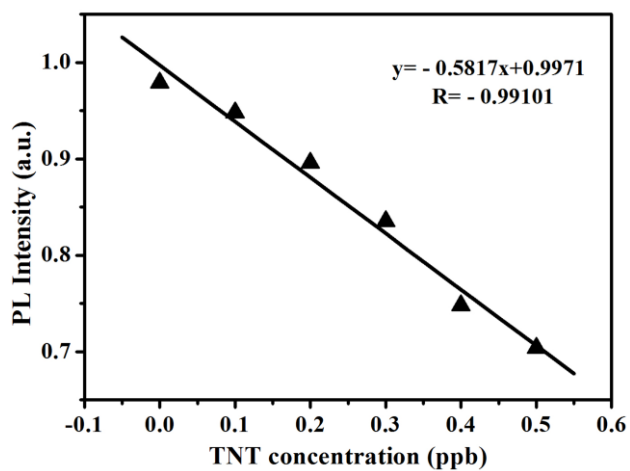

**Figure S9.** Plot of normalized PL intensities of d-TPE/PAA brushes film versus various TNT concentrations (0 – 0.5 ppb) in aqueous solution of NaCl ( $10^{-2}$  M). It shows a linear relationship ( $R=-0.99101$ ) between PL intensity and TNT concentration.
